# Supplementary material for: Found and lost again: Rediscovery of Mollinedia myriantha (Monimiaceae) after 123 years and perspectives for conservation of the family in Brazil
Source: Research Square preprint supplement (doi:10.21203/rs.3.rs-1355829/v1), 2022-02-22
Supplement: Supplementary file 1 [file 2fb1c6d44e3e9977b00685ca.docx]

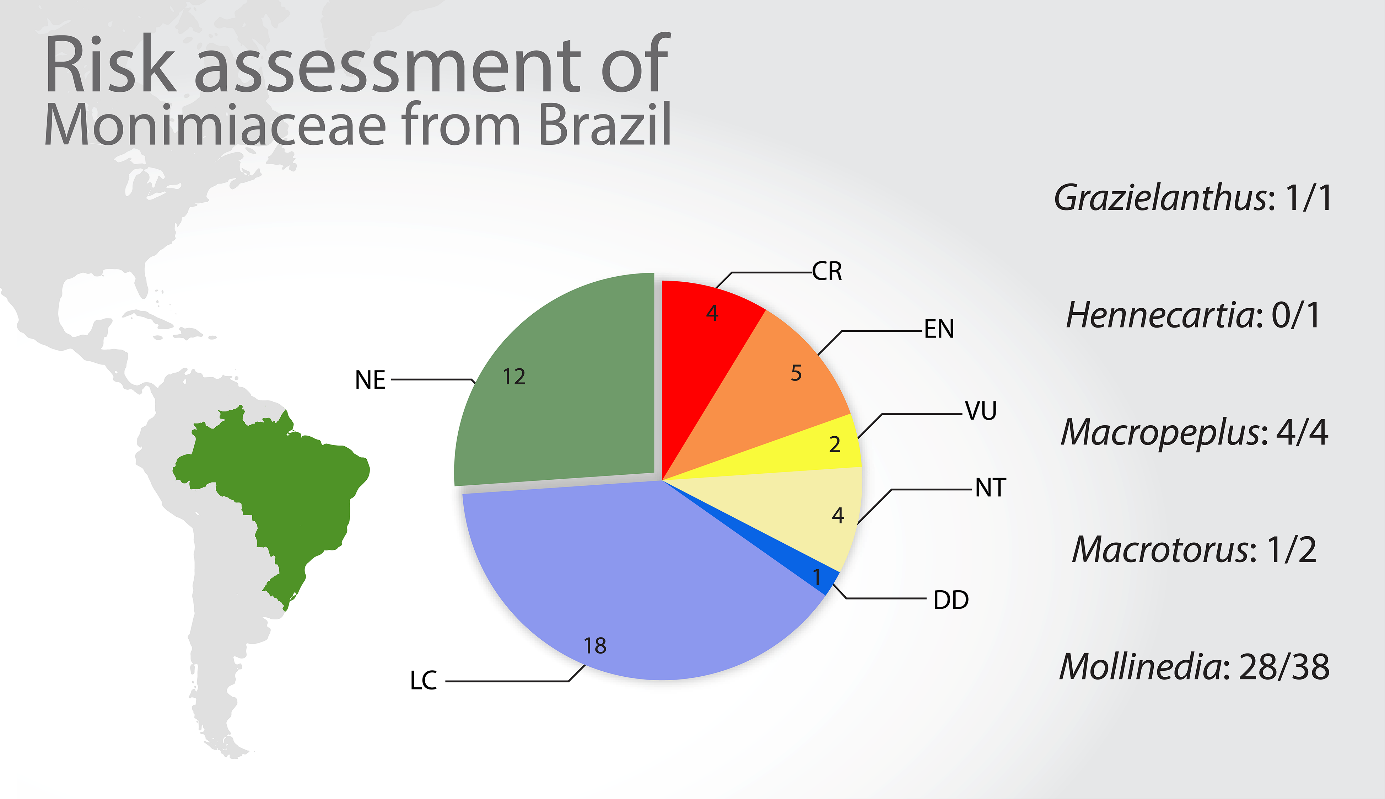


**Fig. S1**. Extinction risk assessment of Monimiaceae from Brazil. DD = Deficient Data, VU = Vulnerable, EN = Endangered, CR = Critically Endangered, NT = Near Threatened, LC = Least Concern, NE = Not Evaluated. Numbers after genera represent the number of species assessed and total numbers of species occurring in Brazil.

Table S1. **Extinction risk assessment of Monimiaceae from Brazil.**

|  | **International** | **National** | | | |  |  |
| --- | --- | --- | --- | --- | --- | --- | --- |
| **Species** | **IUCN** | **CNCFlora website** | **Rare plants from Cerrado** | **Endemic from RJ** | **Regulation Ministry of Environment 443/2014** | **Most recent extinctio risk assessment** | **Reference** |
| *Grazielanthus arkeocarpus* Peixoto & Per.-Moura | NE | NE | NE | **CR** | NE | **CR** | Lírio et al. (2018) |
| *Hennecartia omphalandra* J.Poiss. | NE | NE | NE | NE | NE | NE |  |
| *Macropeplus dentatus* (Perkins) I.Santos & Peixoto | **NT** | NE | NE | NE | NE | **NT** | Moraes et al. (2020a) |
| *Macropeplus friburgensis* (Perkins) I.Santos & Peixoto | NE | **EN** | NE | **CR** | **EN** | **CR** | CNCFlora (2012); Peixoto et al. (2013) |
| *Macropeplus ligustrinus* (Tul.) Perkins | **LC** | NE | NE | NE | NE | **LC** | Botanic Gardens Conservation International (BGCI) & IUCN SSC Global Tree Specialist Group (2019) |
| *Macropeplus schwackeanus* (Perkins) I.Santos & Peixoto | NE | **VU** | **VU** | NE | NE | **VU** | CNCFlora (2012); Guimarães et al. (2014) |
| *Macrotorus genuflexus* Lírio & Peixoto | NE | NE | NE | NE | NE | NE |  |
| *Macrotorus utriculatus* (Mart.) Perkins | NE | **LC** | NE | NE | NE | **LC** | CNCFlora (2012) |
| *Mollinedia acutissima* Perkins | NE | NE | NE | **VU** | NE | **VU** | Lírio et al. (2018) |
| *Mollinedia argyrogyna* Perkins | **NT** | **LC** | NE | NE | NE | **LC** | Peixoto (1998a); CNCFlora (2012) |
| *Mollinedia boracensis* Peixoto | NE | **NT** | NE | NE | NE | **NT** | CNCFlora (2012) |
| *Mollinedia clavigera* Tul. | **LC** | **NT** | NE | NE | NE | **LC** | Botanic Gardens Conservation International (BGCI) & IUCN SSC Global Tree Specialist Group (2019b) ; CNCFlora (2012) |
| *Mollinedia dolichotricha* Lírio & Peixoto | **EN** | NE | NE | NE | NE | **EN** | Fernandez et al. (2021a) |
| *Mollinedia elegans* Tul. | **LC** | NE | NE | NE | NE | **LC** | Botanic Gardens Conservation International (BGCI) & IUCN SSC Global Tree Specialist Group (2019c) |
| *Mollinedia engleriana* Perkins | **VU** | **LC** | NE | NE | NE | **LC** | Peixoto (1998b); CNCFlora (2012) |
| *Mollinedia estrellensis* Tolm. | NE | NE | NE | NE | NE | NE |  |
| *Mollinedia eugeniifolia* Perkins | NE | **EN** | NE | NE | **EN** | **EN** | CNCFlora (2012); Peixoto et al. (2013); |
| *Mollinedia gilgiana* Perkins | **CR** | **LC** | NE | NE | NE | **LC** | Varty (1998a); CNCFlora (2012) |
| *Mollinedia glabra* (Spreng.) Perkins | **VU** | **LC** | NE | NE | NE | **LC** | Peixoto (1998c); CNCFlora (2012) |
| *Mollinedia glaziovii* Perkins | **EN** | NE | NE | NE | NE | **EN** | Fernandez et al. (2021b) |
| *Mollinedia grazielae* Peixoto | NE | NE | NE | NE | NE | NE |  |
| *Mollinedia heteranthera* Perkins | **EN** | NE | NE | NE | NE | **EN** | Moraes et al. (2020b) |
| *Mollinedia howeana* Perkins | NE | NE | NE | NE | NE | NE |  |
| *Mollinedia jorgeorum* Peixoto | **CR** | NE | NE | NE | NE | **CR** | Fernandez et al. (2021c) |
| *Mollinedia killipii* J.F.Macbr. | **LC** | NE | NE | NE | NE | **LC** | IUCN SSC Global Tree Specialist Group & Botanic Gardens Conservation International (BGCI). 2021a. |
| *Mollinedia lamprophylla* Perkins | **CR** | **NT** | NE | NE | NE | **NT** | Varty (1998b); CNCFlora (2012) |
| *Mollinedia lanceolata* Ruiz & Pav. | **LC** | NE | NE | NE | NE | **LC** | IUCN SSC Global Tree Specialist Group & Botanic Gardens Conservation International (BGCI) (2021b). |
| *Mollinedia leucantha* Molz & D. Silveira | NE | NE | NE | NE | NE | NE |  |
| *Mollinedia longicuspidata* Perkins | **EN** | **EN** | NE | NE | **EN** | **EM** | Varty (1998c); CNCFlora (2012); Peixoto et al. (2013) |
| *Mollinedia longifolia* Perkins | **LC** | NE | NE | NE | NE | **LC** | León et al. (2020) |
| *Mollinedia lowtheriana* Perkins | NE | NE | NE | NE | NE | NE |  |
| *Mollinedia luizae* Peixoto | **DD** | **VU** | NE | NE | **VU** | **DD** | Moraes et al. (2020c); CNCFlora (2012); Peixoto et al. (2013) |
| *Mollinedia myriantha* Perkins | NE | NE | NE | NE | NE | NE |  |
| *Mollinedia oligantha* Perkins | **LC** | NE | NE | NE | NE | **LC** | Botanic Gardens Conservation International (BGCI) & IUCN SSC Global Tree Specialist Group (2019d) |
| *Mollinedia ovata* Ruiz & Pav. | **LC** | **LC** | NE | NE | NE | **LC** | Botanic Gardens Conservation International (BGCI) & IUCN SSC Global Tree Specialist Group (2019e); CNCFlora (2012) |
| *Mollinedia pachysandra* Perkins | NE | **LC** | NE | NE | NE | **LC** | CNCFlora (2012) |
| *Mollinedia ptariensis* Steyerm. | NE | NE | NE | NE | NE | NE |  |
| *Mollinedia puberula* Perkins | NE | NE | NE | NE | NE | NE |  |
| *Mollinedia ruschii* Lirio & Peixoto | NE | NE | NE | NE | NE | NE |  |
| *Mollinedia salicifolia* Perkins | NE | **NT** | NE | NE | NE | **NT** | CNCFlora (2012) |
| *Mollinedia schottiana* (Spreng.) Perkins | **LC** | NE | NE | NE | NE | **LC** | Botanic Gardens Conservation International (BGCI) & IUCN SSC Global Tree Specialist Group (2019f) |
| *Mollinedia sphaerantha* Perkins | NE | NE | NE | NE | NE | NE |  |
| *Mollinedia stenophylla* Perkins | **EN** | **NT** | NE | **CR** | NE | **CR** | Varty (1998d); CNCFlora (2012) |
| *Mollinedia triflora* (Spreng.) Tul. | **LC** | NE | NE | NE | NE | **LC** | Botanic Gardens Conservation International (BGCI) & IUCN SSC Global Tree Specialist Group (2019g) |
| *Mollinedia uleana* Perkins | **LC** | NE | NE | NE | NE | **LC** | Botanic Gardens Conservation International (BGCI) & IUCN SSC Global Tree Specialist Group (2019h) |
| *Mollinedia widgrenii* A.DC. | **LC** | NE | NE | NE | NE | **LC** | Botanic Gardens Conservation International (BGCI) & IUCN SSC Global Tree Specialist Group (2019i) |

Reference List S1. References are alphabetically ordered.

Botanic Gardens Conservation International (BGCI), IUCN SSC Global Tree Specialist Group (2019a). *Macropeplus ligustrinus*. The IUCN Red List of Threatened Species 2019. https://www.iucnredlist.org/species/149209012/149209014. 1 February 2022.

Botanic Gardens Conservation International (BGCI), IUCN SSC Global Tree Specialist Group (2019b). *Mollinedia clavigera*. The IUCN Red List of Threatened Species 2019. https://www.iucnredlist.org/species/148754003/148754005. 1 February 2022.

Botanic Gardens Conservation International (BGCI), IUCN SSC Global Tree Specialist Group (2019c). *Mollinedia elegans*. The IUCN Red List of Threatened Species 2019. https://www.iucnredlist.org/species/148754059/148754061. 1 February 2022.

Botanic Gardens Conservation International (BGCI), IUCN SSC Global Tree Specialist Group (2019d). *Mollinedia oligantha*. The IUCN Red List of Threatened Species 2019. https://www.iucnredlist.org/species/148761314/148761317. 1 February 2022.

Botanic Gardens Conservation International (BGCI), IUCN SSC Global Tree Specialist Group (2019e). *Mollinedia ovata*. The IUCN Red List of Threatened Species 2019. 1 February 2022.

Botanic Gardens Conservation International (BGCI), IUCN SSC Global Tree Specialist Group (2019f). *Mollinedia schottiana*. The IUCN Red List of Threatened Species 2019. https://www.iucnredlist.org/species/148760182/148760184. 1 February 2022.

Botanic Gardens Conservation International (BGCI), IUCN SSC Global Tree Specialist Group (2019g). *Mollinedia triflora*. The IUCN Red List of Threatened Species 2019. https://www.iucnredlist.org/species/148758042/148758044. 1 February 2022.

Botanic Gardens Conservation International (BGCI), IUCN SSC Global Tree Specialist Group (2019h). *Mollinedia uleana*. The IUCN Red List of Threatened Species 2019. https://www.iucnredlist.org/species/148761677/148761679. 1 February 2022.

Botanic Gardens Conservation International (BGCI), IUCN SSC Global Tree Specialist Group (2019i). *Mollinedia widgrenii*. The IUCN Red List of Threatened Species 2019. https://www.iucnredlist.org/species/148760998/148761000. 1 February 2022.

CNCFlora (2012). Lista Vermelha da flora brasileira versão 2012.2 Centro Nacional de Conservação da Flora. http://cncflora.jbrj.gov.br/portal. 1 February 2022.

Fernandez, E., Moraes, M., León, M. L. V., Martinelli, G., Lírio, E. J., Peixoto, A. L. (2021a). *Mollinedia dolichotricha*. The IUCN Red List of Threatened Species 2021. doi: 10.2305/IUCN.UK.2021-1.RLTS.T191148698A191148700.pt. 1 February 2022.

Fernandez, E., Moraes, M., Martinelli, G., Lírio, E. J., Peixoto, A. L. (2021b). *Mollinedia glaziovii*. The IUCN Red List of Threatened Species 2021. doi: 10.2305/IUCN.UK.2021-1.RLTS.T191148577A191148580.pt. 1 February 2022.

Fernandez, E., Moraes, M., Martinelli, G., Lírio, E. J., Peixoto, A L. (2021c). *Mollinedia jorgeorum*. The IUCN Red List of Threatened Species 2021. [https://www.iucnredlist.org/species/191148476/191148479. 1 February 2022](https://www.iucnredlist.org/species/191148476/191148479.%2005%20Apr.%202021).

Guimarães, E. F., Queiroz, G. A., Lírio, E. J., Negrão, R., Kutschenko, D., Moraes, L. & Novaes, L. Monimiaceae. (2014). In: Martinelli, G., Messina, T. & Santos Filho, L. (Org.) O livro vermelho da flora do Brasil: plantas raras do Cerrado. Rio de Janeiro: Andrea Jakobson: Instituto de Pesquisas Jardim Botânico do Rio de Janeiro: CNCFlora, p. 199-200.

IUCN SSC Global Tree Specialist Group, Botanic Gardens Conservation International (BGCI) (2021a). *Mollinedia killipii*. The IUCN Red List of Threatened Species 2021. https://www.iucnredlist.org/species/194008910/194008912. 1 February 2022.

IUCN SSC Global Tree Specialist Group, Botanic Gardens Conservation International (BGCI) (2021b). *Mollinedia lanceolata*. The IUCN Red List of Threatened Species 2021. https://www.iucnredlist.org/species/194013255/194013257. 1 February 2022.

León, M. L. V., Bicalho, M., Gomes, M., Ribeiro Júnior, J. W., Fernandez, E., Rosa, P., Martinelli, G., Lírio, E. J. (2020). *Mollinedia longifolia*. The IUCN Red List of Threatened Species 2020. https://www.iucnredlist.org/species/177822711/177822714. 1 February 2022

Lírio, E. J., Peixoto, A. L., Negrão, R., Amorim, T., Braga, R., Avancini, R., Wimmer, F & Margon, H. (2018). Monimiaceae. In: Martinelli, G., Martins, E., Moraes, M., Loyola, R., Amaro, R. (Orgs.) Livro vermelho da flora endêmica do Estado do Rio de Janeiro, Andrea Jakobsson, Rio de Janeiro, pp. 343–346.

Moraes, M., Amorim, E., Ribeiro Júnior, J. W., Rosa, P., Martinelli, G., Zavatin, D. (2020a). *Macropeplus dentatus*. The IUCN Red List of Threatened Species 2020. 1 February 2022.

Moraes, M., León, M. L. V., Lírio, E. J. (2020b). *Mollinedia heteranthera*. The IUCN Red List of Threatened Species 2020. https://www.iucnredlist.org/species/163475599/169287421. 1 February 2022.

Moraes, M., Martinelli, G., Lírio, E. J. (2020c). *Mollinedia luizae*. The IUCN Red List of Threatened Species 2020. https://www.iucnredlist.org/species/176125718/176125720. 1 February 2022.

Peixoto, A. L. (1998a). *Mollinedia argyrogyna*. The IUCN Red List of Threatened Species 1998. https://www.iucnredlist.org/species/37983/10085991. 1 February 2022.

Peixoto, A. L. (1998b). *Mollinedia engleriana*. The IUCN Red List of Threatened Species 1998. https://www.iucnredlist.org/species/37984/10086089. 1 February 2022.

Peixoto, A. L. (1998c). *Mollinedia glabra*. The IUCN Red List of Threatened Species 1998. 1 February 2022.

Peixoto, A. L., Lírio, E. J., Maurenza, D., Reis-Júnior, J. S., Santos-Filho, L. A. F., Abreu, M. B., Bovini, M. G. & Pietro, P. V. (2013). Monimiaceae. *In*: Martinelli, G. & Moraes, M.A. (orgs.) Livro vermelho da flora do Brasil, Rio de Janeiro. Pp. 703-705.

Varty, N. (1998a). *Mollinedia gilgiana*. The IUCN Red List of Threatened Species 1998: e.T33976A9818675. https://dx.doi.org/10.2305/IUCN.UK.1998.RLTS.T33976A9818675.en. Downloaded on 1 February 2022.

Varty, N. (1998b). *Mollinedia lamprophylla*. The IUCN Red List of Threatened Species 1998: e.T33978A9818936. https://dx.doi.org/10.2305/IUCN.UK.1998.RLTS.T33978A9818936.en. Downloaded on 1 February 2022.

Varty, N. (1998c). *Mollinedia longicuspidata*. The IUCN Red List of Threatened Species 1998: e.T33979A9819025. https://dx.doi.org/10.2305/IUCN.UK.1998.RLTS.T33979A9819025.en. Downloaded on 1 February 2022.

Varty, N. (1998d). *Mollinedia stenophylla*. The IUCN Red List of Threatened Species 1998: e.T33980A9819536. https://dx.doi.org/10.2305/IUCN.UK.1998.RLTS.T33980A9819536.en. Downloaded on 1 February 2022.
